# Supplementary material for: The Effects of the Healthy Primary School of the Future on Children’s Fruit and Vegetable Preferences, Familiarity and Intake
Source: MDPI journal article supplement (doi:10.3390/nu13093241), 2021-09-17
Supplement: s1 [file s1]

**Table S1.** Frequency of exposure between T0 and T4 per fruit and vegetable item.

| <b>Fruit</b>              | <b>Frequency of exposure<sup>†</sup></b> | <b>Vegetables</b>             | <b>Frequency of exposure<sup>†</sup></b> |
|---------------------------|------------------------------------------|-------------------------------|------------------------------------------|
| Apple <sup>1,‡</sup>      | 476                                      | Cucumber <sup>‡</sup>         | 355                                      |
| Banana <sup>‡</sup>       | 263                                      | Tomato <sup>6,‡</sup>         | 351                                      |
| Grapes <sup>‡</sup>       | 189                                      | Carrot <sup>‡</sup>           | 349                                      |
| Kiwi <sup>2,‡</sup>       | 126                                      | Bell pepper <sup>7,‡</sup>    | 226                                      |
| Mango <sup>3,‡</sup>      | 115                                      | Lettuce <sup>8,‡</sup>        | 193                                      |
| Tangerine <sup>‡</sup>    | 104                                      | Mixed salad                   | 122                                      |
| Pear <sup>‡</sup>         | 100                                      | Baby corn                     | 97                                       |
| Orange <sup>‡</sup>       | 90                                       | Beet                          | 68                                       |
| Melon <sup>4,‡</sup>      | 84                                       | Avocado                       | 63                                       |
| Pineapple <sup>‡</sup>    | 65                                       | Radish                        | 58                                       |
| Fruit salad               | 60                                       | Celeriac                      | 50                                       |
| Nectarine                 | 32                                       | Cress                         | 47                                       |
| Mineola                   | 21                                       | Zucchini <sup>9,‡</sup>       | 44                                       |
| Plums                     | 20                                       | Celery                        | 44                                       |
| Peach <sup>‡</sup>        | 16                                       | Spinach <sup>‡</sup>          | 30                                       |
| Apricot                   | 11                                       | Pickle                        | 28                                       |
| Strawberries <sup>‡</sup> | 9                                        | Sweet potato                  | 21                                       |
| Grapefruit <sup>5</sup>   | 7                                        | Seaweed                       | 19                                       |
| Pomegranate               | 7                                        | Eggplant <sup>10,‡</sup>      | 10                                       |
| Blackberries              | 7                                        | Fennel                        | 10                                       |
| Blueberries               | 3                                        | Cabbage <sup>11</sup>         | 8                                        |
| Kaki fruit                | 3                                        | Pumpkin                       | 7                                        |
| Dragon fruit              | 3                                        | Onion <sup>‡</sup>            | 6                                        |
| Passion fruit             | 3                                        | Leek <sup>‡</sup>             | 6                                        |
| Carambola                 | 3                                        | Rhubarb                       | 3                                        |
| Papaya                    | 3                                        | Peas <sup>‡</sup>             | 1.5                                      |
|                           |                                          | Asparagus                     | 1.5                                      |
|                           |                                          | Brussels sprouts <sup>‡</sup> | 0                                        |
|                           |                                          | Broccoli <sup>‡</sup>         | 0                                        |
|                           |                                          | Green beans <sup>‡</sup>      | 0                                        |
|                           |                                          | Cauliflower <sup>‡</sup>      | 0                                        |
|                           |                                          | Kale <sup>‡</sup>             | 0                                        |

<sup>1</sup> Including dried apple; <sup>2</sup> Including hardy kiwi; <sup>3</sup> Including dried mango; <sup>4</sup> Including watermelon, cantaloupe, honeydew; <sup>5</sup> Including pomelo; <sup>6</sup> Including snack tomatoes; <sup>7</sup> Including grilled bell pepper; <sup>8</sup> Including arugula, crop, lamb's lettuce, iceberg lettuce, little gem, winter purslane; <sup>9</sup> Including grilled zucchini; <sup>10</sup> Including grilled eggplant; <sup>11</sup> Including red cabbage, bok choy.

<sup>†</sup>Amount of exposures corresponds to the number of times the FV items were included in the lunch cycle. Amount of exposures includes half portions (as the lunch cycle prescribed that the caterer could choose between two FV types, or a mix of both FV types was presented).

<sup>‡</sup>Fruit and vegetable types evaluated in the current study.
