# Supplementary material for: The Effects of the Healthy Primary School of the Future on Children’s Fruit and Vegetable Preferences, Familiarity and Intake
Source: MDPI journal article supplement (doi:10.3390/nu13093241), 2021-09-17
Supplement: s1 [file s1]

**Table S3.** Observed mean fruit and vegetable intake at the various time points (T0-T4).

| Outcome                      | T0        |          |              |          |            | T1        |         |              |          |            | T2        |          |              |          |            |
|------------------------------|-----------|----------|--------------|----------|------------|-----------|---------|--------------|----------|------------|-----------|----------|--------------|----------|------------|
|                              | Full HPSF |          | Partial HPSF |          | <i>p</i> † | Full HPSF |         | Partial HPSF |          | <i>p</i> † | Full HPSF |          | Partial HPSF |          | <i>p</i> † |
|                              | n         | % (n)    | n            | % (n)    |            | n         | % (n)   | n            | % (n)    |            | n         | % (n)    | n            | % (n)    |            |
| Fruit intake                 | 190       |          | 213          |          | 0.298      | 256       |         | 277          |          | 0.586      | 246       |          | 282          |          | 0.315      |
| (almost) Never               |           | 6 (11)   |              | 5 (10)   |            |           | 4 (9)   |              | 4 (12)   |            |           | 5 (11)   |              | 6 (17)   |            |
| Sometimes<br>(1–3 days/week) |           | 16 (31)  |              | 24 (51)  |            |           | 22 (57) |              | 21 (57)  |            |           | 24 (59)  |              | 23 (66)  |            |
| Often<br>(4–6 days/week)     |           | 33 (62)  |              | 30 (63)  |            |           | 36 (93) |              | 32 (89)  |            |           | 39 (96)  |              | 32 (91)  |            |
| Every day                    |           | 45 (86)  |              | 42 (89)  |            |           | 38 (97) |              | 43 (119) |            |           | 33 (80)  |              | 38 (108) |            |
| Vegetable intake             | 184       |          | 196          |          | 0.170      | 230       |         | 270          |          | 0.656      | 230       |          | 268          |          | 0.006 *    |
| (almost) Never               |           | 4 (8)    |              | 4 (7)    |            |           | 7 (15)  |              | 4 (11)   |            |           | 5 (11)   |              | 8 (20)   |            |
| Sometimes<br>(1–3 days/week) |           | 12 (22)  |              | 21 (40)  |            |           | 14 (31) |              | 13 (35)  |            |           | 10 (23)  |              | 18 (48)  |            |
| Often<br>(4–6 days/week)     |           | 39 (72)  |              | 36 (71)  |            |           | 40 (93) |              | 43 (115) |            |           | 40 (91)  |              | 42 (112) |            |
| Every day                    |           | 45 (82)  |              | 40 (78)  |            |           | 40 (91) |              | 40 (109) |            |           | 46 (105) |              | 33 (87)  |            |
| Outcome                      | T3        |          |              |          |            | T4        |         |              |          |            |           |          |              |          |            |
|                              | Full HPSF |          | Partial HPSF |          | <i>p</i> † | Full HPSF |         | Partial HPSF |          | <i>p</i> † |           |          |              |          |            |
|                              | n         | % (n)    | n            | % (n)    |            | n         | % (n)   | n            | % (n)    |            |           |          |              |          |            |
| Fruit intake                 | 241       |          | 281          |          | 0.259      | 184       |         | 234          |          | 0.268      |           |          |              |          |            |
| (almost) Never               |           | 5 (12)   |              | 3 (7)    |            |           | 7 (12)  |              | 3 (8)    |            |           |          |              |          |            |
| Sometimes<br>(1–3 days/week) |           | 20 (47)  |              | 25 (69)  |            |           | 20 (37) |              | 18 (41)  |            |           |          |              |          |            |
| Often<br>(4–6 days/week)     |           | 32 (77)  |              | 29 (82)  |            |           | 36 (67) |              | 35 (81)  |            |           |          |              |          |            |
| Every day                    |           | 44 (105) |              | 44 (123) |            |           | 37 (68) |              | 44 (104) |            |           |          |              |          |            |
| Vegetable intake             | 220       |          | 277          |          | 0.674      | 173       |         | 223          |          | 0.364      |           |          |              |          |            |
| (almost) Never               |           | 4 (9)    |              | 7 (18)   |            |           | 4 (7)   |              | 3 (6)    |            |           |          |              |          |            |
| Sometimes<br>(1–3 days/week) |           | 14 (31)  |              | 13 (35)  |            |           | 11 (19) |              | 13 (29)  |            |           |          |              |          |            |
| Often<br>(4–6 days/week)     |           | 42 (92)  |              | 42 (116) |            |           | 42 (73) |              | 49 (109) |            |           |          |              |          |            |
| Every day                    |           | 40 (88)  |              | 39 (108) |            |           | 43 (74) |              | 35 (79)  |            |           |          |              |          |            |

† Analyzed by X2 test.

Abbreviations: HPSF, Healthy Primary School of the Future.

\* Significant ( $\leq 0.05$ ) difference between full and partial HPSF without correction for baseline.
