# Supplementary material for: The Effects of the Healthy Primary School of the Future on Children’s Fruit and Vegetable Preferences, Familiarity and Intake
Source: MDPI journal article supplement (doi:10.3390/nu13093241), 2021-09-17
Supplement: s1 [file s1]

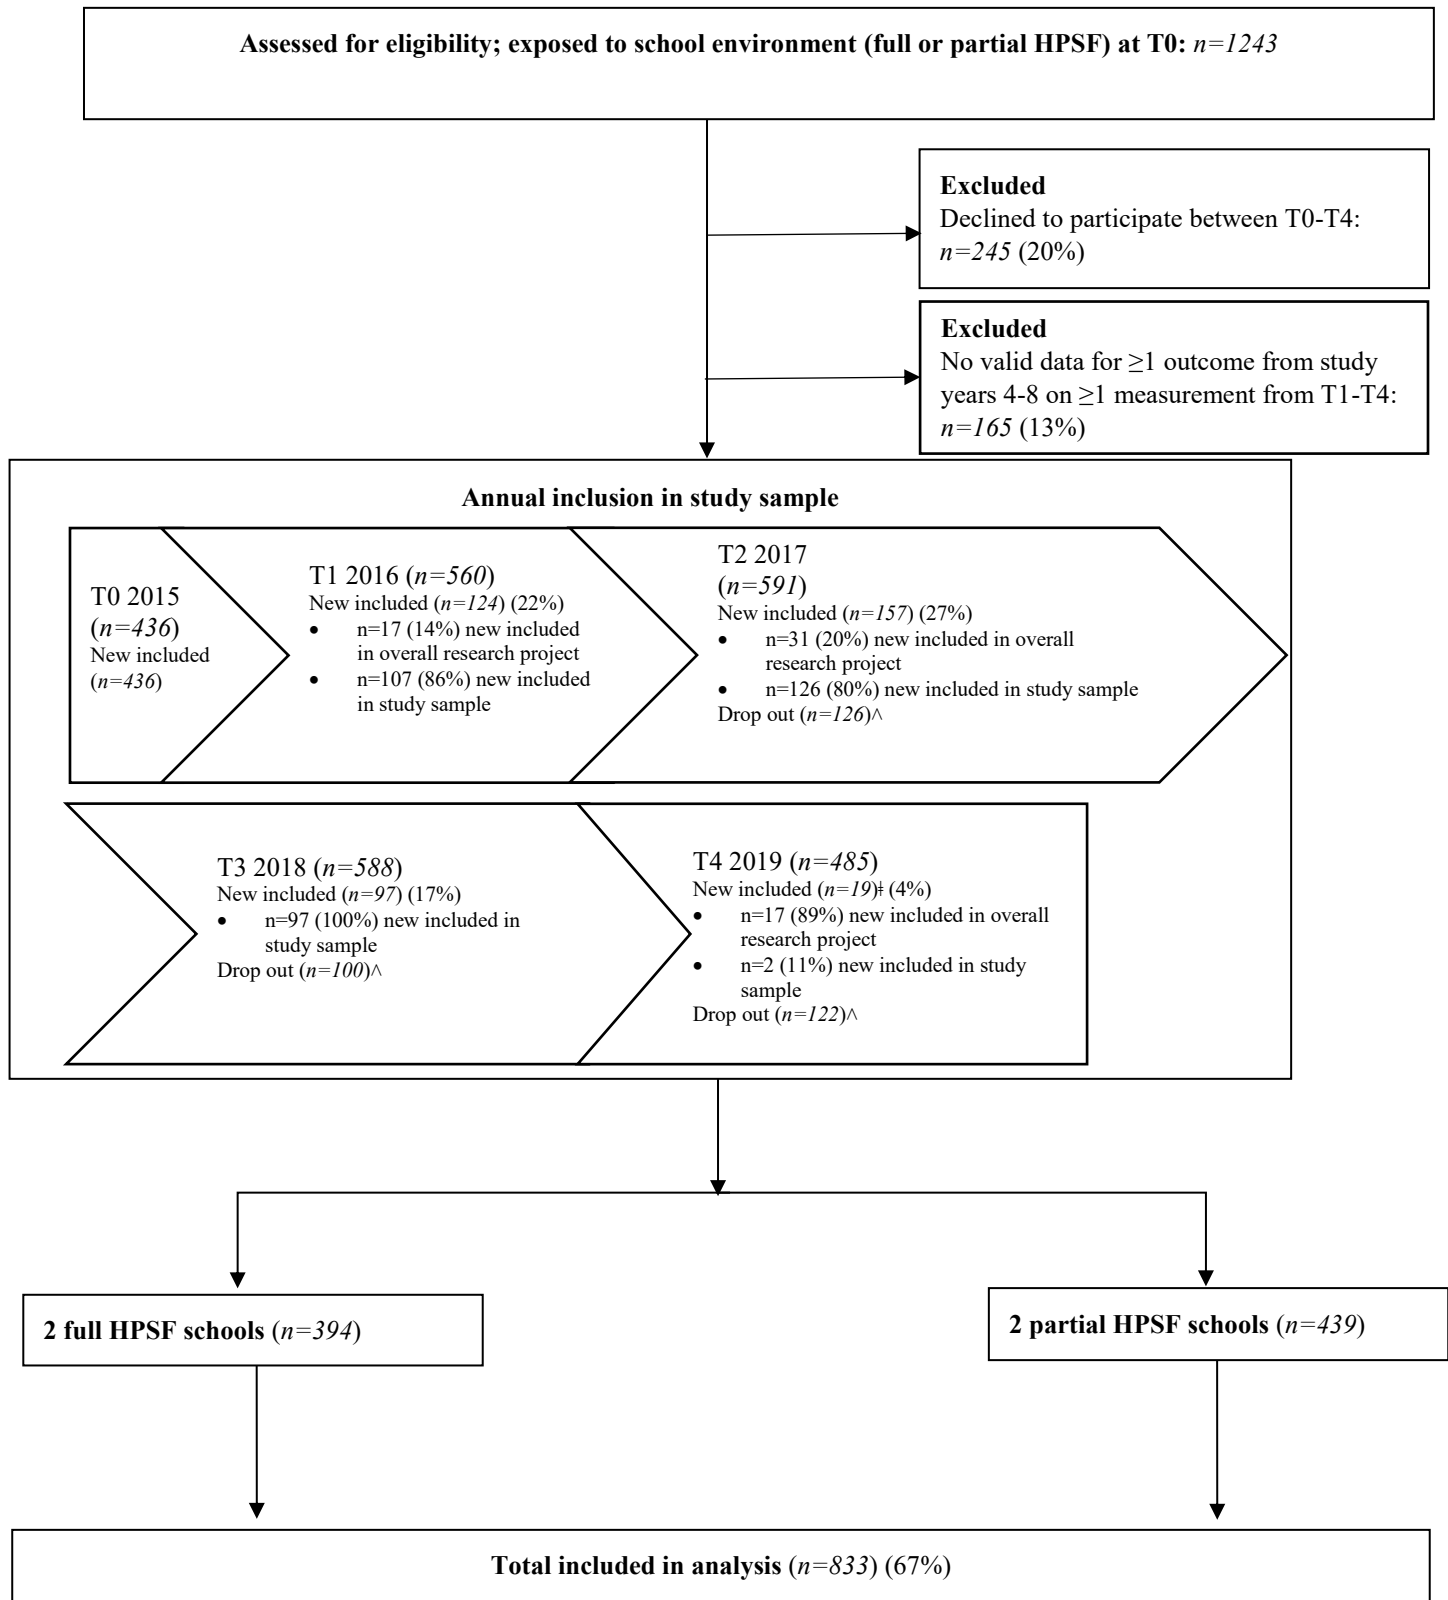

**Figure S1.** Trial profile.

Abbreviations: HPSF, Healthy Primary School of the Future.

<sup>‡</sup> Newly included participants include subjects who started participation in the overall research project after T0 and subjects who already participated in the research project while in study years 1-3, but are included in the present study's sample from the moment they are in study years 4-8.

<sup>^</sup> Reasons for drop out over the four years include graduation ( $n=345$ ), or other ( $n=3$ ) including migration, actively stopping participation or switching to other included schools.

*Note.* Between T0-T1, no drop out was observed as subjects were only included in the present study if they had  $\geq 1$  valid measurement between T1-T4. Reported drop out numbers only include subjects dropping out of the current study, not the overall research project.
