# Supplementary material for: The Effects of the Healthy Primary School of the Future on Children’s Fruit and Vegetable Preferences, Familiarity and Intake
Source: MDPI journal article supplement (doi:10.3390/nu13093241), 2021-09-17
Supplement: s1 [file s1]

**Table S2.** Observed mean fruit and vegetable familiarity and preference scores at the various time points (T0-T4).

| <b>T0</b>        |                    |                       |     |                  |                  |                      |                     |                       |     |                  |                  |                       |
|------------------|--------------------|-----------------------|-----|------------------|------------------|----------------------|---------------------|-----------------------|-----|------------------|------------------|-----------------------|
| <b>Item</b>      | <b>Full HPSF</b>   |                       |     |                  |                  |                      | <b>Partial HPSF</b> |                       |     |                  |                  |                       |
|                  | <b>Familiarity</b> |                       |     | <b>Liking</b>    |                  |                      | <b>Familiarity</b>  |                       |     | <b>Liking</b>    |                  |                       |
|                  | n                  | % (n)<br>Unfamiliar   | n   | % (n)<br>Dislike | % (n)<br>Neutral | % (n)<br>Like        | n                   | % (n)<br>Unfamiliar   | n   | % (n)<br>Dislike | % (n)<br>Neutral | % (n)<br>Like         |
| Apple            | 198                | 1 (1)                 | 197 | 2 (4)            | 21 (42)          | 77 (151)             | 219                 | 0 (0)                 | 219 | 3 (6)            | 16 (35)          | 81 (178)              |
| Banana           | 198                | 0 (0)                 | 198 | 16 (31)          | 31 (62)          | 53 (105)             | 219                 | 2 (4)                 | 215 | 9 (19)           | 18 (39)          | 73 (157)              |
| Tangerine        | 198                | 4 (8)                 | 190 | 15 (28)          | 34 (64)          | 52 (98)              | 220                 | 2 (5)                 | 215 | 14 (30)          | 28 (60)          | 58 (125)              |
| Orange           | 197                | 7 (14)                | 183 | 19 (34)          | 28 (51)          | 54 (98)              | 219                 | 5 (11)                | 208 | 17 (36)          | 25 (52)          | 58 (120)              |
| Pineapple        | 197                | 18 (35) <sup>1</sup>  | 162 | 20 (32)          | 22 (35)          | 59 (95)              | 220                 | 15 (32) <sup>1</sup>  | 188 | 22 (42)          | 19 (36)          | 59 (110)              |
| Pear             | 197                | 3 (6)                 | 190 | 12 (22)          | 34 (64)          | 55 (104)             | 219                 | 1 (2)                 | 217 | 18 (39)          | 18 (40)          | 64 (138)              |
| Melon            | 197                | 5 (10)                | 187 | 11 (21)          | 9 (16)           | 80 (150)             | 219                 | 6 (13)                | 206 | 6 (13)           | 8 (16)           | 86 (177)              |
| Kiwi             | 198                | 7 (13)                | 185 | 21 (38)          | 22 (40)          | 58 (107)             | 218                 | 6 (13)                | 205 | 14 (28)          | 16 (33)          | 70 (144)              |
| Strawberry       | 198                | 2 (4)                 | 193 | 3 (6)            | 10 (20)          | 87 (167)             | 220                 | 1 (3)                 | 217 | 3 (6)            | 3 (6)            | 95 (205)              |
| Mango            | 198                | 32 (64) <sup>1</sup>  | 133 | 21 (28)          | 23 (31)          | 56 (74)              | 221                 | 36 (79) <sup>1</sup>  | 142 | 21 (30)          | 18 (26)          | 61 (86)               |
| Peach            | 198                | 15 (29) <sup>1</sup>  | 169 | 12 (20)          | 27 (45)          | 62 (104)             | 221                 | 16 (36) <sup>1</sup>  | 185 | 10 (18)          | 16 (29)          | 75 (138)              |
| Grapes           | 198                | 2 (4)                 | 194 | 6 (12)           | 18 (35)          | 76 (147)             | 221                 | 2 (5)                 | 216 | 2 (4)            | 11 (24)          | 87 (188)              |
| Cauliflower      | 198                | 6 (12)                | 186 | 20 (37)          | 28 (52)          | 52 (97)              | 222                 | 5 (10)                | 212 | 21 (44)          | 26 (55)          | 53 (113)              |
| Zucchini         | 198                | 27 (53) <sup>1</sup>  | 144 | 56 (80)          | 22 (31)          | 23 (33) <sup>2</sup> | 219                 | 27 (59) <sup>1</sup>  | 160 | 50 (80)          | 16 (26)          | 34 (54) <sup>2</sup>  |
| Carrot           | 198                | 0 (0)                 | 198 | 11 (22)          | 24 (48)          | 65 (128)             | 222                 | 1 (2)                 | 220 | 16 (35)          | 17 (37)          | 67 (148)              |
| Cucumber         | 199                | 1 (1)                 | 198 | 4 (8)            | 11 (21)          | 85 (169)             | 222                 | 1 (3)                 | 219 | 4 (9)            | 10 (22)          | 86 (188)              |
| Bell pepper      | 199                | 4 (7)                 | 192 | 23 (44)          | 17 (32)          | 60 (116)             | 222                 | 8 (17)                | 205 | 22 (44)          | 20 (41)          | 56 (120)              |
| Broccoli         | 199                | 3 (5)                 | 193 | 18 (35)          | 25 (48)          | 57 (110)             | 222                 | 5 (11)                | 211 | 20 (42)          | 23 (48)          | 57 (121)              |
| Green beans      | 198                | 7 (13)                | 185 | 21 (39)          | 28 (51)          | 51 (95)              | 221                 | 6 (13)                | 208 | 28 (59)          | 23 (48)          | 49 (101) <sup>2</sup> |
| Eggplant         | 198                | 54 (107) <sup>1</sup> | 91  | 56 (51)          | 24 (22)          | 20 (18) <sup>2</sup> | 221                 | 46 (101) <sup>1</sup> | 120 | 55 (66)          | 23 (27)          | 23 (27) <sup>2</sup>  |
| Kale             | 197                | 25 (49) <sup>1</sup>  | 148 | 26 (38)          | 22 (32)          | 53 (78)              | 222                 | 19 (42) <sup>1</sup>  | 180 | 26 (47)          | 21 (38)          | 53 (95)               |
| Brussels sprouts | 199                | 9 (18)                | 181 | 54 (97)          | 17 (30)          | 30 (54) <sup>2</sup> | 221                 | 6 (13)                | 208 | 50 (103)         | 12 (25)          | 39 (80) <sup>2</sup>  |
| Leek             | 195                | 15 (29) <sup>1</sup>  | 166 | 36 (60)          | 33 (55)          | 31 (51) <sup>2</sup> | 216                 | 17 (36) <sup>1</sup>  | 180 | 32 (58)          | 32 (58)          | 36 (64) <sup>2</sup>  |
| Tomato           | 199                | 2 (4)                 | 195 | 28 (55)          | 16 (32)          | 55 (108)             | 219                 | 3 (6)                 | 213 | 24 (52)          | 13 (27)          | 63 (134)              |
| Lettuce          | 198                | 3 (6)                 | 192 | 10 (20)          | 16 (30)          | 74 (142)             | 220                 | 5 (11)                | 209 | 10 (21)          | 17 (36)          | 73 (152)              |
| Spinach          | 198                | 5 (10)                | 188 | 25 (46)          | 18 (34)          | 57 (108)             | 220                 | 7 (16)                | 204 | 25 (50)          | 19 (39)          | 56 (115)              |
| Onion            | 198                | 8 (15)                | 183 | 35 (64)          | 32 (59)          | 33 (60) <sup>2</sup> | 216                 | 6 (13)                | 203 | 44 (90)          | 25 (50)          | 31 (63) <sup>2</sup>  |
| Peas             | 199                | 13 (26) <sup>1</sup>  | 173 | 24 (42)          | 21 (37)          | 54 (94)              | 220                 | 15 (33) <sup>1</sup>  | 187 | 25 (47)          | 24 (44)          | 51 (96)               |

**T1**

| Item             | Full HPSF   |                      |        |                  |                  |                       | Partial HPSF |                       |        |                  |                  |                       |
|------------------|-------------|----------------------|--------|------------------|------------------|-----------------------|--------------|-----------------------|--------|------------------|------------------|-----------------------|
|                  | Familiarity |                      | Liking |                  |                  |                       | Familiarity  |                       | Liking |                  |                  |                       |
|                  | n           | % (n)<br>Unfamiliar  | n      | % (n)<br>Dislike | % (n)<br>Neutral | % (n)<br>Like         | n            | % (n)<br>Unfamiliar   | n      | % (n)<br>Dislike | % (n)<br>Neutral | % (n)<br>Like         |
| Apple            | 263         | 0 (0)                | 263    | 3 (9)            | 24 (64)          | 72 (190)              | 283          | 0 (1)                 | 282    | 2 (6)            | 17 (48)          | 81 (228)              |
| Banana           | 263         | 0 (0)                | 263    | 15 (39)          | 23 (60)          | 62 (164)              | 283          | 0 (1)                 | 282    | 9 (25)           | 26 (73)          | 65 (184)              |
| Tangerine        | 262         | 3 (7)                | 255    | 18 (46)          | 33 (84)          | 49 (125) <sup>2</sup> | 283          | 4 (11)                | 272    | 14 (37)          | 26 (71)          | 60 (164)              |
| Orange           | 261         | 8 (20)               | 241    | 21 (50)          | 34 (83)          | 45 (108) <sup>2</sup> | 282          | 5 (14)                | 268    | 9 (25)           | 28 (74)          | 63 (169)              |
| Pineapple        | 262         | 11 (29) <sup>1</sup> | 232    | 21 (49)          | 17 (40)          | 62 (143)              | 282          | 16 (45) <sup>1</sup>  | 236    | 20 (47)          | 19 (45)          | 61 (144)              |
| Pear             | 261         | 0 (1)                | 260    | 15 (40)          | 31 (81)          | 54 (139)              | 282          | 2 (6)                 | 276    | 14 (39)          | 20 (55)          | 66 (182)              |
| Melon            | 263         | 1 (3)                | 260    | 14 (36)          | 12 (32)          | 74 (192)              | 282          | 4 (10)                | 271    | 7 (20)           | 7 (20)           | 85 (231)              |
| Kiwi             | 263         | 4 (11)               | 252    | 20 (50)          | 26 (65)          | 54 (137)              | 281          | 8 (22)                | 259    | 13 (33)          | 22 (57)          | 65 (169)              |
| Strawberry       | 263         | 2 (5)                | 258    | 5 (12)           | 7 (18)           | 88 (228)              | 283          | 1 (4)                 | 279    | 3 (9)            | 5 (13)           | 92 (257)              |
| Mango            | 261         | 25 (65) <sup>1</sup> | 196    | 30 (58)          | 20 (40)          | 50 (98) <sup>2</sup>  | 283          | 36 (102) <sup>1</sup> | 181    | 18 (32)          | 19 (34)          | 64 (115)              |
| Peach            | 263         | 15 (39) <sup>1</sup> | 224    | 18 (40)          | 18 (41)          | 64 (143)              | 282          | 14 (39) <sup>1</sup>  | 243    | 12 (29)          | 16 (38)          | 72 (176)              |
| Grapes           | 263         | 2 (4)                | 259    | 4 (10)           | 18 (46)          | 78 (203)              | 282          | 1 (4)                 | 278    | 4 (11)           | 11 (31)          | 85 (236)              |
| Cauliflower      | 264         | 5 (12)               | 252    | 20 (50)          | 35 (87)          | 46 (115) <sup>2</sup> | 283          | 4 (10)                | 273    | 20 (54)          | 30 (81)          | 51 (138)              |
| Zucchini         | 264         | 14 (36) <sup>1</sup> | 227    | 58 (131)         | 20 (45)          | 23 (51) <sup>2</sup>  | 282          | 23 (64) <sup>1</sup>  | 217    | 48 (105)         | 25 (55)          | 26 (57) <sup>2</sup>  |
| Carrot           | 264         | 1 (2)                | 262    | 16 (41)          | 23 (60)          | 62 (161)              | 282          | 1 (3)                 | 279    | 13 (37)          | 20 (56)          | 67 (186)              |
| Cucumber         | 263         | 1 (2)                | 260    | 5 (13)           | 6 (16)           | 89 (231)              | 283          | 1 (4)                 | 279    | 4 (12)           | 8 (21)           | 88 (246)              |
| Bell pepper      | 263         | 3 (8)                | 255    | 23 (59)          | 18 (46)          | 59 (150)              | 283          | 5 (13)                | 270    | 16 (44)          | 16 (44)          | 67 (182)              |
| Broccoli         | 264         | 1 (2)                | 261    | 21 (55)          | 23 (61)          | 56 (145)              | 282          | 5 (13)                | 269    | 20 (55)          | 18 (49)          | 61 (165)              |
| Green beans      | 264         | 3 (8)                | 256    | 25 (63)          | 35 (89)          | 41 (104) <sup>2</sup> | 280          | 8 (21)                | 259    | 25 (65)          | 27 (71)          | 48 (123) <sup>2</sup> |
| Eggplant         | 262         | 34 (88) <sup>1</sup> | 174    | 71 (123)         | 19 (33)          | 10 (18) <sup>2</sup>  | 280          | 50 (139) <sup>1</sup> | 141    | 53 (75)          | 23 (32)          | 24 (34) <sup>2</sup>  |
| Kale             | 263         | 24 (64) <sup>1</sup> | 199    | 34 (67)          | 26 (51)          | 41 (81) <sup>2</sup>  | 282          | 22 (61) <sup>1</sup>  | 220    | 24 (52)          | 20 (44)          | 56 (124)              |
| Brussels sprouts | 261         | 7 (19)               | 242    | 53 (128)         | 18 (44)          | 29 (70) <sup>2</sup>  | 282          | 9 (25)                | 257    | 50 (129)         | 18 (45)          | 32 (83) <sup>2</sup>  |
| Leek             | 261         | 12 (31) <sup>1</sup> | 230    | 41 (94)          | 35 (81)          | 24 (55) <sup>2</sup>  | 279          | 18 (50) <sup>1</sup>  | 229    | 28 (65)          | 31 (70)          | 41 (94) <sup>2</sup>  |
| Tomato           | 262         | 2 (4)                | 257    | 28 (71)          | 16 (41)          | 56 (145)              | 282          | 3 (9)                 | 273    | 25 (67)          | 15 (42)          | 60 (164)              |
| Lettuce          | 262         | 2 (4)                | 258    | 16 (42)          | 27 (69)          | 57 (147)              | 281          | 5 (13)                | 268    | 8 (21)           | 18 (47)          | 75 (200)              |
| Spinach          | 262         | 5 (14)               | 247    | 25 (61)          | 19 (47)          | 56 (139)              | 282          | 9 (24)                | 258    | 21 (53)          | 17 (43)          | 63 (162)              |
| Onion            | 262         | 6 (15)               | 247    | 40 (98)          | 36 (89)          | 24 (60) <sup>2</sup>  | 282          | 8 (23)                | 259    | 32 (83)          | 35 (90)          | 33 (86) <sup>2</sup>  |
| Peas             | 260         | 8 (20)               | 239    | 25 (60)          | 29 (70)          | 46 (109) <sup>2</sup> | 282          | 10 (28) <sup>1</sup>  | 254    | 21 (52)          | 29 (73)          | 51 (129)              |

**T2**

| Item             | Full HPSF   |                      |     |                  |                  |                       | Partial HPSF |                       |     |                  |                  |                       |
|------------------|-------------|----------------------|-----|------------------|------------------|-----------------------|--------------|-----------------------|-----|------------------|------------------|-----------------------|
|                  | Familiarity |                      |     | Liking           |                  |                       | Familiarity  |                       |     | Liking           |                  |                       |
|                  | n           | % (n)<br>Unfamiliar  | n   | % (n)<br>Dislike | % (n)<br>Neutral | % (n)<br>Like         | n            | % (n)<br>Unfamiliar   | n   | % (n)<br>Dislike | % (n)<br>Neutral | % (n)<br>Like         |
| Apple            | 254         | 0 (0)                | 254 | 2 (6)            | 25 (63)          | 73 (185)              | 286          | 1 (2)                 | 284 | 4 (12)           | 19 (53)          | 77 (219)              |
| Banana           | 254         | 0 (0)                | 254 | 13 (33)          | 23 (59)          | 64 (162)              | 286          | 1 (2)                 | 284 | 11 (32)          | 23 (65)          | 66 (187)              |
| Tangerine        | 252         | 4 (10)               | 242 | 17 (40)          | 31 (76)          | 52 (126)              | 286          | 2 (5)                 | 281 | 17 (47)          | 29 (80)          | 55 (154)              |
| Orange           | 252         | 9 (23)               | 229 | 21 (47)          | 31 (71)          | 49 (111) <sup>2</sup> | 284          | 6 (18)                | 265 | 14 (37)          | 31 (82)          | 55 (146)              |
| Pineapple        | 250         | 14 (34) <sup>1</sup> | 216 | 20 (44)          | 22 (48)          | 57 (124)              | 285          | 18 (51) <sup>1</sup>  | 234 | 21 (48)          | 21 (48)          | 59 (138)              |
| Pear             | 253         | 0 (1)                | 252 | 12 (31)          | 29 (73)          | 59 (148)              | 285          | 3 (7)                 | 278 | 17 (46)          | 23 (65)          | 60 (167)              |
| Melon            | 253         | 3 (7)                | 246 | 11 (26)          | 12 (29)          | 78 (191)              | 285          | 3 (8)                 | 277 | 8 (23)           | 8 (22)           | 84 (232)              |
| Kiwi             | 252         | 5 (12)               | 240 | 21 (51)          | 28 (66)          | 51 (123)              | 285          | 7 (20)                | 265 | 18 (47)          | 22 (59)          | 60 (159)              |
| Strawberry       | 254         | 1 (2)                | 252 | 5 (12)           | 9 (23)           | 86 (217)              | 286          | 1 (4)                 | 282 | 4 (12)           | 5 (15)           | 90 (255)              |
| Mango            | 254         | 22 (56) <sup>1</sup> | 198 | 35 (70)          | 21 (41)          | 44 (87) <sup>2</sup>  | 286          | 38 (108) <sup>1</sup> | 178 | 22 (39)          | 15 (27)          | 63 (112)              |
| Peach            | 253         | 14 (36) <sup>1</sup> | 217 | 21 (45)          | 21 (45)          | 59 (127)              | 286          | 19 (54) <sup>1</sup>  | 232 | 19 (44)          | 20 (46)          | 61 (142)              |
| Grapes           | 253         | 1 (3)                | 250 | 8 (19)           | 17 (43)          | 75 (188)              | 285          | 2 (5)                 | 280 | 4 (11)           | 15 (43)          | 81 (226)              |
| Cauliflower      | 254         | 3 (7)                | 247 | 23 (57)          | 31 (76)          | 46 (114) <sup>2</sup> | 285          | 5 (13)                | 272 | 28 (77)          | 27 (72)          | 45 (123) <sup>2</sup> |
| Zucchini         | 254         | 10 (25) <sup>1</sup> | 229 | 66 (150)         | 21 (49)          | 13 (30) <sup>2</sup>  | 284          | 25 (70) <sup>1</sup>  | 214 | 52 (111)         | 25 (54)          | 23 (49) <sup>2</sup>  |
| Carrot           | 253         | 0 (1)                | 252 | 14 (36)          | 27 (69)          | 58 (147)              | 283          | 1 (2)                 | 281 | 18 (50)          | 23 (65)          | 59 (166)              |
| Cucumber         | 252         | 1 (2)                | 250 | 7 (18)           | 10 (24)          | 83 (208)              | 284          | 1 (2)                 | 282 | 4 (12)           | 8 (22)           | 88 (248)              |
| Bell pepper      | 254         | 2 (6)                | 248 | 29 (71)          | 19 (48)          | 52 (129)              | 284          | 5 (15)                | 269 | 19 (52)          | 16 (44)          | 64 (173)              |
| Broccoli         | 254         | 2 (5)                | 249 | 21 (53)          | 27 (67)          | 52 (129)              | 286          | 3 (9)                 | 277 | 23 (63)          | 23 (63)          | 55 (151)              |
| Green beans      | 253         | 6 (15)               | 238 | 26 (61)          | 29 (68)          | 46 (109) <sup>2</sup> | 281          | 6 (16)                | 265 | 29 (77)          | 25 (65)          | 46 (123) <sup>2</sup> |
| Eggplant         | 253         | 39 (98) <sup>1</sup> | 155 | 74 (114)         | 18 (28)          | 8 (13) <sup>2</sup>   | 284          | 56 (160) <sup>1</sup> | 124 | 67 (83)          | 20 (25)          | 13 (16) <sup>2</sup>  |
| Kale             | 251         | 20 (50) <sup>1</sup> | 201 | 35 (70)          | 25 (50)          | 40 (81) <sup>2</sup>  | 286          | 24 (69) <sup>1</sup>  | 217 | 29 (63)          | 26 (57)          | 45 (97) <sup>2</sup>  |
| Brussels sprouts | 251         | 6 (15)               | 236 | 51 (121)         | 18 (43)          | 31 (72) <sup>2</sup>  | 285          | 7 (21)                | 264 | 55 (145)         | 15 (39)          | 30 (80) <sup>2</sup>  |
| Leek             | 249         | 12 (29) <sup>1</sup> | 220 | 40 (87)          | 32 (70)          | 29 (63) <sup>2</sup>  | 282          | 21 (60) <sup>1</sup>  | 222 | 38 (84)          | 30 (66)          | 32 (72) <sup>2</sup>  |
| Tomato           | 253         | 2 (5)                | 248 | 32 (79)          | 11 (27)          | 57 (142)              | 284          | 3 (9)                 | 275 | 28 (77)          | 15 (42)          | 57 (156)              |
| Lettuce          | 253         | 4 (9)                | 244 | 15 (36)          | 25 (62)          | 60 (146)              | 285          | 4 (12)                | 273 | 12 (33)          | 22 (61)          | 66 (179)              |
| Spinach          | 253         | 5 (13)               | 240 | 28 (67)          | 19 (45)          | 53 (128)              | 285          | 7 (21)                | 264 | 30 (78)          | 17 (45)          | 53 (141)              |
| Onion            | 252         | 6 (16)               | 236 | 43 (102)         | 31 (72)          | 26 (62) <sup>2</sup>  | 284          | 7 (21)                | 263 | 43 (112)         | 27 (72)          | 30 (79) <sup>2</sup>  |
| Peas             | 252         | 8 (19)               | 233 | 26 (60)          | 23 (54)          | 51 (119)              | 285          | 11 (32) <sup>1</sup>  | 253 | 31 (78)          | 26 (65)          | 44 (110) <sup>2</sup> |

**T3**

| Item             | Full HPSF   |                      |        |                  |                  |                       | Partial HPSF |                       |        |                  |                  |                       |
|------------------|-------------|----------------------|--------|------------------|------------------|-----------------------|--------------|-----------------------|--------|------------------|------------------|-----------------------|
|                  | Familiarity |                      | Liking |                  |                  | % (n)<br>Like         | Familiarity  |                       | Liking |                  |                  | % (n)<br>Like         |
|                  | n           | % (n)<br>Unfamiliar  | n      | % (n)<br>Dislike | % (n)<br>Neutral |                       | n            | % (n)<br>Unfamiliar   | n      | % (n)<br>Dislike | % (n)<br>Neutral |                       |
| Apple            | 246         | 0 (0)                | 246    | 1 (3)            | 23 (57)          | 76 (186)              | 289          | 0 (0)                 | 289    | 5 (13)           | 16 (47)          | 79 (229)              |
| Banana           | 246         | 0 (0)                | 246    | 12 (29)          | 24 (60)          | 64 (157)              | 289          | 0 (0)                 | 289    | 10 (30)          | 18 (52)          | 72 (207)              |
| Tangerine        | 245         | 2 (5)                | 240    | 14 (33)          | 31 (74)          | 55 (133)              | 289          | 1 (4)                 | 285    | 12 (35)          | 25 (72)          | 63 (178)              |
| Orange           | 246         | 5 (12)               | 233    | 23 (54)          | 27 (63)          | 50 (116) <sup>2</sup> | 289          | 4 (10)                | 278    | 10 (29)          | 27 (75)          | 63 (174)              |
| Pineapple        | 246         | 12 (29) <sup>1</sup> | 217    | 26 (56)          | 20 (44)          | 54 (117)              | 289          | 10 (28) <sup>1</sup>  | 261    | 22 (56)          | 14 (37)          | 64 (168)              |
| Pear             | 246         | 1 (2)                | 244    | 16 (39)          | 28 (67)          | 57 (138)              | 288          | 1 (3)                 | 285    | 17 (48)          | 25 (72)          | 58 (165)              |
| Melon            | 246         | 4 (9)                | 237    | 13 (30)          | 6 (15)           | 81 (192)              | 286          | 1 (4)                 | 282    | 9 (24)           | 9 (24)           | 83 (234)              |
| Kiwi             | 246         | 4 (9)                | 236    | 21 (49)          | 22 (52)          | 57 (135)              | 288          | 6 (18)                | 270    | 15 (41)          | 21 (56)          | 64 (173)              |
| Strawberry       | 245         | 1 (3)                | 242    | 3 (7)            | 8 (19)           | 89 (216)              | 289          | 1 (2)                 | 287    | 6 (18)           | 4 (12)           | 90 (257)              |
| Mango            | 245         | 21 (52) <sup>1</sup> | 193    | 33 (64)          | 25 (49)          | 42 (80) <sup>2</sup>  | 287          | 30 (87) <sup>1</sup>  | 200    | 19 (38)          | 19 (37)          | 63 (125)              |
| Peach            | 247         | 13 (33) <sup>1</sup> | 214    | 23 (50)          | 25 (53)          | 52 (111)              | 287          | 20 (56) <sup>1</sup>  | 231    | 15 (35)          | 20 (45)          | 65 (151)              |
| Grapes           | 246         | 0 (1)                | 245    | 7 (17)           | 17 (42)          | 76 (186)              | 287          | 2 (5)                 | 282    | 4 (12)           | 14 (39)          | 82 (231)              |
| Cauliflower      | 247         | 5 (11)               | 236    | 23 (55)          | 24 (56)          | 53 (125)              | 287          | 5 (14)                | 273    | 26 (71)          | 29 (79)          | 45 (123) <sup>2</sup> |
| Zucchini         | 245         | 11 (27) <sup>1</sup> | 218    | 65 (142)         | 18 (40)          | 17 (36) <sup>2</sup>  | 287          | 25 (71) <sup>1</sup>  | 216    | 51 (111)         | 27 (59)          | 21 (46) <sup>2</sup>  |
| Carrot           | 247         | 0 (1)                | 246    | 17 (41)          | 22 (54)          | 61 (151)              | 286          | 2 (7)                 | 279    | 17 (48)          | 23 (64)          | 60 (167)              |
| Cucumber         | 247         | 1 (2)                | 245    | 7 (16)           | 12 (29)          | 82 (200)              | 285          | 1 (2)                 | 283    | 6 (16)           | 6 (17)           | 88 (250)              |
| Bell pepper      | 246         | 4 (9)                | 237    | 25 (60)          | 13 (30)          | 62 (147)              | 287          | 4 (12)                | 275    | 22 (61)          | 18 (49)          | 60 (165)              |
| Broccoli         | 246         | 2 (5)                | 241    | 25 (61)          | 21 (51)          | 54 (129)              | 285          | 3 (8)                 | 276    | 21 (59)          | 26 (72)          | 53 (145)              |
| Green beans      | 245         | 5 (13)               | 232    | 27 (62)          | 27 (62)          | 47 (108) <sup>2</sup> | 286          | 7 (19)                | 267    | 29 (76)          | 29 (77)          | 43 (114) <sup>2</sup> |
| Eggplant         | 244         | 39 (96) <sup>1</sup> | 148    | 72 (107)         | 17 (25)          | 11 (16) <sup>2</sup>  | 286          | 53 (152) <sup>1</sup> | 134    | 67 (90)          | 18 (24)          | 15 (20) <sup>2</sup>  |
| Kale             | 247         | 22 (54) <sup>1</sup> | 193    | 33 (64)          | 27 (52)          | 40 (77) <sup>2</sup>  | 287          | 23 (67) <sup>1</sup>  | 220    | 33 (72)          | 27 (60)          | 40 (88) <sup>2</sup>  |
| Brussels sprouts | 241         | 6 (14)               | 227    | 52 (117)         | 18 (40)          | 31 (70) <sup>2</sup>  | 290          | 9 (27)                | 263    | 54 (141)         | 14 (37)          | 32 (85) <sup>2</sup>  |
| Leek             | 241         | 16 (38) <sup>1</sup> | 203    | 41 (84)          | 29 (59)          | 30 (60) <sup>2</sup>  | 290          | 25 (71) <sup>1</sup>  | 219    | 42 (92)          | 29 (64)          | 29 (63) <sup>2</sup>  |
| Tomato           | 241         | 2 (4)                | 237    | 27 (65)          | 16 (37)          | 57 (135)              | 289          | 4 (10)                | 279    | 28 (78)          | 13 (37)          | 59 (164)              |
| Lettuce          | 242         | 2 (4)                | 238    | 18 (43)          | 24 (56)          | 58 (139)              | 289          | 4 (11)                | 278    | 16 (43)          | 23 (63)          | 62 (172)              |
| Spinach          | 242         | 5 (12)               | 230    | 25 (58)          | 17 (40)          | 57 (132)              | 290          | 11 (31) <sup>1</sup>  | 259    | 29 (75)          | 19 (50)          | 52 (134)              |
| Onion            | 242         | 4 (9)                | 232    | 44 (101)         | 32 (73)          | 25 (58) <sup>2</sup>  | 290          | 9 (27)                | 263    | 41 (108)         | 25 (65)          | 34 (90) <sup>2</sup>  |
| Peas             | 241         | 10 (23) <sup>1</sup> | 218    | 27 (59)          | 24 (52)          | 49 (107) <sup>2</sup> | 290          | 14 (41) <sup>1</sup>  | 249    | 32 (80)          | 25 (63)          | 43 (106) <sup>2</sup> |

**T4**

| Item             | Full HPSF   |                      |     |                  |                  |                      | Partial HPSF |                       |     |                  |                  |                       |
|------------------|-------------|----------------------|-----|------------------|------------------|----------------------|--------------|-----------------------|-----|------------------|------------------|-----------------------|
|                  | Familiarity |                      |     | Liking           |                  |                      | Familiarity  |                       |     | Liking           |                  |                       |
|                  | n           | % (n)<br>Unfamiliar  | n   | % (n)<br>Dislike | % (n)<br>Neutral | % (n)<br>Like        | n            | % (n)<br>Unfamiliar   | n   | % (n)<br>Dislike | % (n)<br>Neutral | % (n)<br>Like         |
| Apple            | 192         | 0 (0)                | 192 | 2 (3)            | 21 (40)          | 78 (149)             | 239          | 0 (0)                 | 239 | 4 (10)           | 18 (44)          | 77 (185)              |
| Banana           | 192         | 0 (0)                | 192 | 14 (27)          | 26 (49)          | 60 (116)             | 239          | 0 (0)                 | 239 | 9 (22)           | 22 (52)          | 69 (165)              |
| Tangerine        | 94          | 5 (5)                | 187 | 13 (24)          | 35 (65)          | 52 (98)              | 98           | 2 (2)                 | 236 | 10 (23)          | 31 (72)          | 60 (141)              |
| Orange           | 192         | 7 (14)               | 178 | 15 (27)          | 35 (62)          | 50 (89) <sup>2</sup> | 237          | 2 (5)                 | 232 | 11 (25)          | 24 (56)          | 65 (151)              |
| Pineapple        | 191         | 16 (31) <sup>1</sup> | 160 | 26 (41)          | 17 (27)          | 58 (92)              | 238          | 5 (12)                | 226 | 19 (43)          | 20 (44)          | 62 (139)              |
| Pear             | 191         | 1 (1)                | 190 | 17 (33)          | 32 (60)          | 51 (97)              | 239          | 0 (0)                 | 239 | 16 (37)          | 26 (62)          | 59 (140)              |
| Melon            | 192         | 4 (8)                | 184 | 11 (20)          | 7 (13)           | 82 (151)             | 239          | 0 (1)                 | 238 | 7 (16)           | 8 (19)           | 85 (203)              |
| Kiwi             | 192         | 4 (8)                | 184 | 18 (33)          | 26 (48)          | 56 (103)             | 239          | 4 (9)                 | 230 | 19 (44)          | 20 (46)          | 61 (140)              |
| Strawberry       | 192         | 1 (2)                | 190 | 1 (2)            | 4 (8)            | 95 (180)             | 239          | 0 (1)                 | 238 | 4 (10)           | 6 (13)           | 90 (215)              |
| Mango            | 193         | 21 (41) <sup>1</sup> | 152 | 32 (49)          | 16 (25)          | 51 (78)              | 241          | 25 (59) <sup>1</sup>  | 182 | 20 (37)          | 18 (33)          | 62 (112)              |
| Peach            | 193         | 18 (35) <sup>1</sup> | 157 | 12 (19)          | 27 (42)          | 61 (96)              | 241          | 15 (35) <sup>1</sup>  | 206 | 15 (31)          | 22 (46)          | 63 (129)              |
| Grapes           | 193         | 1 (2)                | 191 | 4 (7)            | 17 (33)          | 79 (151)             | 241          | 1 (2)                 | 239 | 6 (15)           | 14 (34)          | 80 (190)              |
| Cauliflower      | 192         | 4 (7)                | 185 | 23 (43)          | 20 (36)          | 57 (106)             | 240          | 5 (12)                | 228 | 26 (59)          | 27 (61)          | 47 (108) <sup>2</sup> |
| Zucchini         | 192         | 14 (27) <sup>1</sup> | 165 | 58 (95)          | 22 (36)          | 21 (34) <sup>2</sup> | 240          | 25 (61) <sup>1</sup>  | 179 | 54 (97)          | 27 (48)          | 19 (34) <sup>2</sup>  |
| Carrot           | 191         | 1 (2)                | 189 | 16 (30)          | 24 (45)          | 60 (114)             | 241          | 0 (1)                 | 239 | 16 (38)          | 27 (65)          | 57 (136)              |
| Cucumber         | 191         | 1 (1)                | 190 | 6 (11)           | 11 (20)          | 84 (159)             | 240          | 0 (1)                 | 239 | 6 (14)           | 9 (22)           | 85 (203)              |
| Bell pepper      | 192         | 4 (7)                | 184 | 21 (38)          | 15 (28)          | 64 (118)             | 239          | 2 (5)                 | 234 | 20 (47)          | 12 (27)          | 68 (160)              |
| Broccoli         | 192         | 2 (3)                | 189 | 21 (39)          | 25 (48)          | 54 (102)             | 241          | 3 (6)                 | 235 | 20 (48)          | 22 (52)          | 57 (135)              |
| Green beans      | 192         | 6 (11)               | 181 | 25 (45)          | 31 (56)          | 44 (80) <sup>2</sup> | 241          | 6 (15)                | 226 | 29 (65)          | 26 (59)          | 45 (102) <sup>2</sup> |
| Eggplant         | 192         | 43 (82) <sup>1</sup> | 110 | 72 (79)          | 11 (12)          | 17 (19) <sup>2</sup> | 241          | 52 (124) <sup>1</sup> | 116 | 64 (74)          | 26 (30)          | 10 (12) <sup>2</sup>  |
| Kale             | 192         | 20 (38) <sup>1</sup> | 154 | 34 (52)          | 25 (39)          | 41 (63) <sup>2</sup> | 241          | 24 (58) <sup>1</sup>  | 183 | 34 (62)          | 26 (48)          | 40 (73) <sup>2</sup>  |
| Brussels sprouts | 193         | 9 (17)               | 176 | 52 (91)          | 14 (24)          | 35 (61) <sup>2</sup> | 240          | 9 (21)                | 219 | 53 (116)         | 18 (39)          | 29 (64) <sup>2</sup>  |
| Leek             | 191         | 16 (30) <sup>1</sup> | 161 | 37 (59)          | 30 (48)          | 34 (54) <sup>2</sup> | 239          | 18 (43) <sup>1</sup>  | 196 | 35 (68)          | 34 (67)          | 31 (61) <sup>2</sup>  |
| Tomato           | 193         | 2 (3)                | 190 | 33 (62)          | 12 (22)          | 56 (106)             | 240          | 4 (9)                 | 231 | 27 (63)          | 10 (23)          | 63 (145)              |
| Lettuce          | 193         | 1 (2)                | 191 | 16 (30)          | 26 (50)          | 58 (111)             | 240          | 3 (6)                 | 234 | 16 (38)          | 19 (44)          | 65 (152)              |
| Spinach          | 193         | 4 (7)                | 186 | 25 (46)          | 20 (38)          | 55 (102)             | 238          | 7 (17)                | 221 | 29 (63)          | 19 (41)          | 53 (117)              |
| Onion            | 193         | 7 (13)               | 180 | 39 (70)          | 32 (57)          | 29 (53) <sup>2</sup> | 238          | 8 (18)                | 220 | 35 (77)          | 31 (67)          | 35 (76) <sup>2</sup>  |
| Peas             | 193         | 11 (22) <sup>1</sup> | 171 | 26 (45)          | 27 (46)          | 47 (80) <sup>2</sup> | 239          | 14 (33) <sup>1</sup>  | 206 | 28 (57)          | 23 (47)          | 50 (102) <sup>2</sup> |

Note. Preference values were handled as missing values for participants who indicated to be unfamiliar with the specific FV item and for participants who selected >1 answer option.

Abbreviations: HPSF, Healthy Primary School of the Future.

<sup>1</sup> ≥10% participants indicated to be unfamiliar with the FV item. <sup>2</sup> ≤50% participants indicated to like the FV item.
