# Supplementary material for: The Effects of the Healthy Primary School of the Future on Children’s Fruit and Vegetable Preferences, Familiarity and Intake
Source: Nutrients. 2021 Sep 17;13(9):3241. doi: 10.3390/nu13093241 (PMC8469863; doi:10.3390/nu13093241)
Supplement: Supplementary file 1 [file nutrients-13-03241-s001.zip]

Archive with 6 entries (6 files):
- Figure S1. Trial profile..pdf
- Table S1. Frequency of exposure between T0 and T4 per fruit and vegetable item..pdf
- Table S2. Observed mean fruit and vegetable familiarity and preference scores at the various time points (T0-T4)..pdf
- Table S3. Observed mean fruit and vegetable intake at the various time points (T0-T4)..pdf
- Table S4. Estimated intervention effects on fruit and vegetable familiarity as examined by a post hoc analysis using new summary scores..pdf
- Table S5. Estimated intervention effects on vegetable familiarity and preferences as examined by a post hoc analysis..pdf
